# Supplementary material for: Recent Advances in Biosensor Technologies for Point-of-Care Urinalysis
Source: MDPI journal article supplement (doi:10.3390/bios12111020), 2022-11-15
Supplement: s1 [file s1]

# Recent Advances in Biosensor Technologies for Point-of-Care Urinalysis

Chuljin Hwang <sup>1</sup>, Won-June Lee <sup>2</sup>, Su Dong Kim <sup>3</sup>, Sungjun Park <sup>1,4,\*</sup> and Joo Hee Kim <sup>5,\*</sup>

<sup>1</sup> Electrical and Computer Engineering, Ajou University, Suwon 16499, Republic of Korea

<sup>2</sup> Department of Chemistry, Purdue University, West Lafayette, IN 47907, USA

<sup>3</sup> Graduate School of Clinical Pharmacy and Pharmaceutics, Ajou University, Suwon 16499, Republic of Korea

<sup>4</sup> Leading Convergence of Healthcare and Medicine, Institute of Science & Technology (ALChEMIST), Ajou University, Suwon 16499, Republic of Korea

<sup>5</sup> College of Pharmacy, Ajou University, Suwon 16499, Republic of Korea

\* Correspondence: sj0223park@ajou.ac.kr (S.P.); elisekim@ajou.ac.kr (J.H.K.)

Table S1. Selected operators and search items and terms for the statistical publication analysis of “biosensors developed to identify urine-based biomarkers that are typically detected by dipstick tests.”

| Groups         | Search Items and Terms                                                                                                                                                  |
|----------------|-------------------------------------------------------------------------------------------------------------------------------------------------------------------------|
| (A) Samples    | “body (AND) fluids” OR “urine”                                                                                                                                          |
| (B) Biomarkers | “hydrogen (AND) ion” OR “nitrites” OR “protein” OR “blood” OR “bilirubin” OR “glucose” OR “ketone” OR “leukocytes (AND) esterase” OR “sodium” OR “chloride” OR “iodide” |
| (C) Devices    | “sensor” OR “biosensor” OR “detector”                                                                                                                                   |

Table S2. Summary of previously reported review papers of biosensors for several biomarkers

| Biomarkers | Review papers                                                                                                                                                                                                                                                                                          |
|------------|--------------------------------------------------------------------------------------------------------------------------------------------------------------------------------------------------------------------------------------------------------------------------------------------------------|
| Glucose    | Fenoy, G.E.; Marmisollé, W.A.; Knoll, W.; Azzaroni, O. Highly Sensitive Urine Glucose Detection with Graphene Field-Effect Transistors Functionalized with Electropolymerized Nanofilms. <i>Sens. Diagn.</i> <b>2022</b> , 10.1039.D1SD00007A, doi:10.1039/D1SD00007A.                                 |
|            | Huang, C.; Hao, Z.; Wang, Z.; Zhao, X.; Wang, H.; Li, F.; Liu, S.; Pan, Y. A Fully Integrated Graphene-Polymer Field-Effect Transistor Biosensing Device for on-Site Detection of Glucose in Human Urine. <i>Materials Today Chemistry</i> <b>2022</b> , 23, 100635, doi:10.1016/j.mtchem.2021.100635. |
| pH         | Rabboh, F.M.; O’Neil, G.D. Voltammetric PH Measurements in Unadulterated Foodstuffs, Urine, and Serum with 3D-Printed Graphene/Poly(Lactic Acid) Electrodes. <i>Anal. Chem.</i> <b>2020</b> , 92, 14999–15006, doi:10.1021/acs.analchem.0c02902.                                                       |
|            | Lee, S.; Park, S.; Kim, C.-H.; Yoon, M.-H. Approaching the Nernst Detection Limit in an Electrolyte-Gated Metal Oxide Transistor. <i>IEEE Electron Device Lett.</i> <b>2021</b> , 42, 50–53, doi:10.1109/LED.2020.3040149.                                                                             |
|            | Chae, M.-S.; Park, J.H.; Son, H.W.; Hwang, K.S.; Kim, T.G. IGZO-Based Electrolyte-Gated Field-Effect Transistor for in Situ Biological Sensing Platform. <i>Sensors and Actuators B: Chemical</i> <b>2018</b> , 262, 876–883, doi:10.1016/j.snb.2018.02.090.                                           |
| Protein    | Kim, B.; Kim, T.H. Determination of Human Serum Albumin Using a Single-Walled Carbon Nanotube-FET Modified with Bromocresol Green. <i>Microchim Acta</i> <b>2016</b> , 183, 1513–1518, doi:10.1007/s00604-016-1815-6.                                                                                  |

|                    |                                                                                                                                                                                                                                                                                                                                                                                                                                      |
|--------------------|--------------------------------------------------------------------------------------------------------------------------------------------------------------------------------------------------------------------------------------------------------------------------------------------------------------------------------------------------------------------------------------------------------------------------------------|
|                    | Zhang, G.; Yu, Y.; Guo, M.; Lin, B.; Zhang, L. A Sensitive Determination of Albumin in Urine by Molecularly Imprinted Electrochemical Biosensor Based on Dual-Signal Strategy. <i>Sensors and Actuators B: Chemical</i> <b>2019</b> , <i>288</i> , 564–570, doi:10.1016/j.snb.2019.03.042.                                                                                                                                           |
|                    | A. Karim, S.S.; Nadzirah, Sh.; Kazmi, J.; A. Rahim, R.; Dee, C.F.; Hamzah, A.A.; Mohamed, M.A. Zinc Oxide Nanorods-Based Immuno-Field-Effect Transistor for Human Serum Albumin Detection. <i>J. Mater. Sci.</i> <b>2021</b> , <i>56</i> , 15344–15353, doi:10.1007/s10853-021-06288-0.                                                                                                                                              |
| Ketone             | Go, A.; Park, S.R.; Ku, Y.; Sun, M.; Yeon, S.; Lee, J.-K.; Lee, S.W.; Lee, M.-H. Highly Sensitive Electrochemical Sensor for Diagnosis of Diabetic Ketoacidosis (DKA) by Measuring Ketone Bodies in Urine. <i>Sensors</i> <b>2021</b> , <i>21</i> , 4902, doi:10.3390/s21144902.                                                                                                                                                     |
| Blood              | Anirudhan, T.S.; Alexander, S. A Potentiometric Sensor for the Trace Level Determination of Hemoglobin in Real Samples Using Multiwalled Carbon Nanotube Based Molecular Imprinted Polymer. <i>European Polymer Journal</i> <b>2017</b> , <i>97</i> , 84–93, doi:10.1016/j.eurpolymj.2017.09.048.                                                                                                                                    |
| Nitrite            | Zhou, Y.; Ma, M.; He, H.; Cai, Z.; Gao, N.; He, C.; Chang, G.; Wang, X.; He, Y. Highly Sensitive Nitrite Sensor Based on AuNPs/RGO Nanocomposites Modified Graphene Electrochemical Transistors. <i>Biosensors and Bioelectronics</i> <b>2019</b> , <i>146</i> , 111751, doi:10.1016/j.bios.2019.111751.                                                                                                                             |
|                    | Cardoso, R.M.; Silva, P.R.L.; Lima, A.P.; Rocha, D.P.; Oliveira, T.C.; do Prado, T.M.; Fava, E.L.; Fatibello-Filho, O.; Richter, E.M.; Muñoz, R.A.A. 3D-Printed Graphene/Poly(lactic Acid) Electrode for Bioanalysis: Biosensing of Glucose and Simultaneous Determination of Uric Acid and Nitrite in Biological Fluids. <i>Sensors and Actuators B: Chemical</i> <b>2020</b> , <i>307</i> , 127621, doi:10.1016/j.snb.2019.127621. |
| Bilirubin          | Thangamuthu, M.; Gabriel, W.; Santschi, C.; Martin, O. Electrochemical Sensor for Bilirubin Detection Using Screen Printed Electrodes Functionalized with Carbon Nanotubes and Graphene. <i>Sensors</i> <b>2018</b> , <i>18</i> , 800, doi:10.3390/s18030800.                                                                                                                                                                        |
|                    | Rahman, M.M.; Ahmed, J.; Asiri, A.M. Selective Bilirubin Sensor Fabrication Based on Doped IAO Nanorods for Environmental Remediation. <i>New J. Chem.</i> <b>2019</b> , <i>43</i> , 19298–19307, doi:10.1039/C9NJ05477D.                                                                                                                                                                                                            |
| Leukocyte esterase | Ho, M.-L.; Liu, W.-F.; Tseng, H.-Y.; Yeh, Y.-T.; Tseng, W.-T.; Chou, Y.-Y.; Huang, X.-R.; Hsu, H.-C.; Ho, L.-I.; Pan, S.-W. Quantitative Determination of Leukocyte Esterase with a Paper-Based Device. <i>RSC Adv.</i> <b>2020</b> , <i>10</i> , 27042–27049, doi:10.1039/D0RA03306E.                                                                                                                                               |
| NMP-22             | Wu, D.; Wang, Y.; Zhang, Y.; Ma, H.; Yan, T.; Du, B.; Wei, Q. Sensitive Electrochemical Immunosensor for Detection of Nuclear Matrix Protein-22 Based on NH <sub>2</sub> -SAPO-34 Supported Pd/Co Nanoparticles. <i>Sci Rep</i> <b>2016</b> , <i>6</i> , 24551, doi:10.1038/srep24551.                                                                                                                                               |
|                    | Li, Y.; Zeng, B.; Yang, Y.; Liang, H.; Yang, Y.; Yuan, Q. Design of High Stability Thin-Film Transistor Biosensor for the Diagnosis of Bladder Cancer. <i>Chinese Chemical Letters</i> <b>2020</b> , <i>31</i> , 1387–1391, doi:10.1016/j.ccl.2020.03.043.                                                                                                                                                                           |
|                    | Yang, Y.; Wang, J.; Huang, W.; Wan, G.; Xia, M.; Chen, D.; Zhang, Y.; Wang, Y.; Guo, F.; Tan, J.; et al. Integrated Urinalysis Devices Based on Interface-Engineered Field-Effect Transistor Biosensors Incorporated With Electronic Circuits. <i>Advanced Materials</i> <b>2022</b> , <i>34</i> , 2203224, doi:10.1002/adma.202203224.                                                                                              |
| PSA                | Pal, M.; Khan, R. Graphene Oxide Layer Decorated Gold Nanoparticles Based Immunosensor for the Detection of Prostate Cancer Risk Factor. <i>Analytical Biochemistry</i> <b>2017</b> , <i>536</i> , 51–58, doi:10.1016/j.ab.2017.08.001.                                                                                                                                                                                              |
| miR-107            | Koo, K.M.; Carrascosa, L.G.; Shiddiky, M.J.A.; Trau, M. Poly(A) Extensions of MiRNAs for Amplification-Free Electrochemical Detection on Screen-Printed Gold Electrodes. <i>Anal. Chem.</i> <b>2016</b> , <i>88</i> , 2000–2005, doi:10.1021/acs.analchem.5b04795.                                                                                                                                                                   |

|                |                                                                                                                                                                                                                                                                                                 |
|----------------|-------------------------------------------------------------------------------------------------------------------------------------------------------------------------------------------------------------------------------------------------------------------------------------------------|
| Sodium ions    | Oh, H.G.; Jeon, D.C.; Gianti, M.S.; Cho, H.S.; Jo, D.A.; Indriatmoko, M.N.; Jang, B.K.; Lim, J.M.; Cho, S.; Song, K.S. Two-Dimensional Disposable Graphene Sensor to Detect Na <sup>+</sup> Ions. <i>Nanomaterials</i> <b>2021</b> , <i>11</i> , 787, doi:10.3390/nano11030787.                 |
| Potassium ions | Iannazzo, D.; Espro, C.; Ferlazzo, A.; Celesti, C.; Branca, C.; Neri, G. Electrochemical and Fluorescent Properties of Crown Ether Functionalized Graphene Quantum Dots for Potassium and Sodium Ions Detection. <i>Nanomaterials</i> <b>2021</b> , <i>11</i> , 2897, doi:10.3390/nano11112897. |
| Chloride ions  | Cunha-Silva, H.; Julia Arcos-Martinez, M. Development of a Selective Chloride Sensing Platform Using a Screen-Printed Platinum Electrode. <i>Talanta</i> <b>2019</b> , <i>195</i> , 771–777, doi:10.1016/j.talanta.2018.12.008.                                                                 |
| Iodide ions    | Khunseeraksa, V.; Kongkaew, S.; Thavarungkul, P.; Kanatharana, P.; Limbut, W. Electrochemical Sensor for the Quantification of Iodide in Urine of Pregnant Women. <i>Microchim Acta</i> <b>2020</b> , <i>187</i> , 591, doi:10.1007/s00604-020-04488-0.                                         |
|                | Hwang, C.; Kwak, T.; Kim, C.-H.; Kim, J.H.; Park, S. Quantitative and Rapid Detection of Iodide Ion via Electrolyte-Gated IGZO Thin-Film Transistors. <i>Sensors and Actuators B: Chemical</i> <b>2022</b> , <i>353</i> , 131144, doi:10.1016/j.snb.2021.131144.                                |

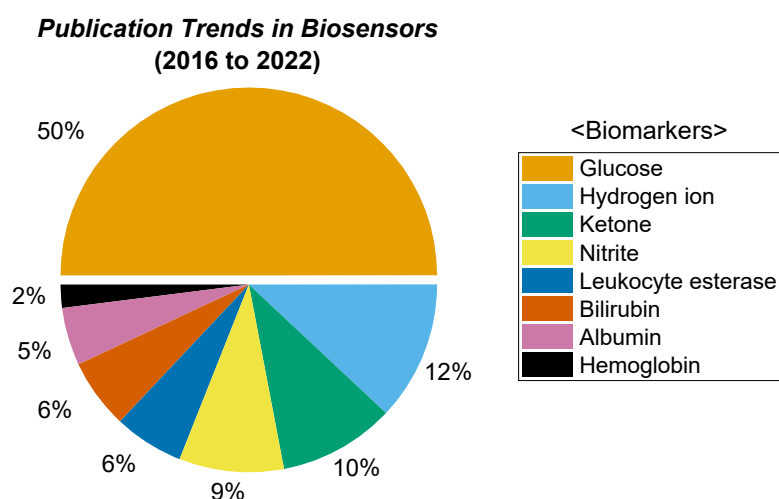

Figure S1. Publication trends in the biosensor research field based on the PubMed, Scopus, IEEE Xplore, Google Scholar, and Embase electronic databases from 2016 to 2022 for detecting urine-based biomarkers that are traditionally detected by dipstick tests. (Percentage of the number of the biosensors for specific biomarkers to the number of urine-based biosensors publications)
